# Supplementary material
Source: publisher site journal article supplement (https://www.dovepress.com/get_supplementary_file.php?f=422916.docx)
Supplement: Supplementary file 1 [file get_supplementary_file.php]

Table S1 Region distribution of the participants

|  | N | % |
| --- | --- | --- |
| Municipalities  Beijing  Tianjin  Shanghai  Chongqing | 32  44  30  36 | 2.6  3.6  2.5  3.0 |
| Provinces  Henan  Hubei  Anhui  Qinghai  Hebei  Heilongjiang  Jiangsu  Shandong  Fujian  Guangdong  Hunan  Shanxi  Gansu  Liaoning  Zhejiang  Jilin  Shannxi  Hainan  Guizhou  Sichuan  Yunnan  Jiangxi | 118  59  25  23  82  31  33  50  79  17  58  64  28  21  32  9  17  6  13  68  36  36 | 9.7  4.8  2.0  1.9  6.7  2.5  2.7  4.1  6.5  1.4  4.8  5.2  2.3  1.7  2.6  0.7  1.4  0.5  1.1  5.6  3.0  3.0 |
| Autonomous regions  Ningxia  Tibet  Guangxi  Inner Mongolia  Xinjiang | 24  1  25  59  64 | 2.0  0.1  2.0  4.8  5.2 |
